# Supplementary material
Source: Springer Nature journal article supplement (https://www.springermedizin.de/resource/supplementary/12881_2010_896_MOESM3_ESM.pdf/9451522)

600  
500  
400  
300  
200  
100  
bp

M

TT

CC

CT

CT

CT

CT

CC

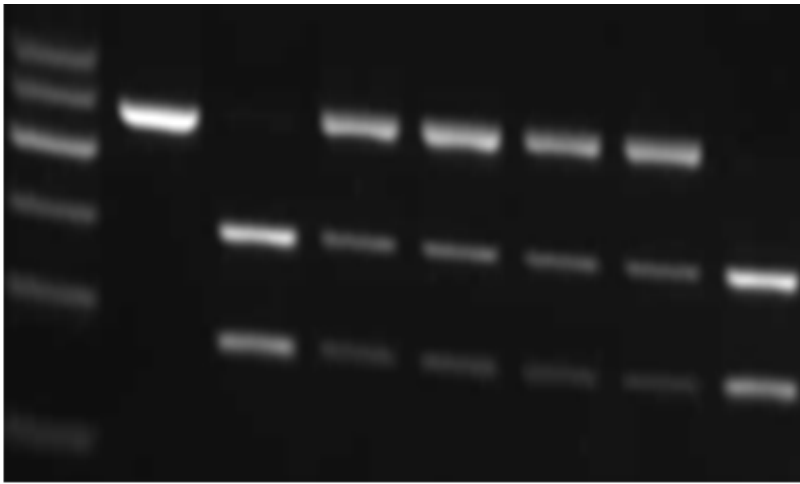

Supplement: MOESM3 [file 9451522]
